1 **Breakpoint modelling of temporal associations between non-pharmaceutical interventions and**  
2 **the incidence of symptomatic COVID-19 in the Republic of Ireland**

3

4 **Boudou M<sup>1\*</sup>, ÓhAiseadha C<sup>1,2</sup>, Garvey, P<sup>1,3</sup>, O'Dwyer J<sup>1,4,5</sup>, Hynds P<sup>1,5\*</sup>**

5

6 <sup>1</sup> SpatioTemporal Environmental Epidemiology Research (STEER) Group, Environmental  
7 Sustainability & Health Institute, Technological University Dublin, Dublin, Ireland

8 <sup>2</sup> Health Service Executive, (HSE), Dublin, Ireland

9 <sup>3</sup> Health Protection Surveillance Centre (HPSC), Dublin, Ireland

10 <sup>4</sup> School of Biological, Earth and Environmental Sciences, University College Cork, Cork, Ireland

11 <sup>5</sup> Irish Centre for Research in Applied Geoscience, University College Dublin, Dublin, Ireland.

12

13 \*Corresponding Authors; [hyndsp@tcd.ie](mailto:hyndsp@tcd.ie); [martin.boudou@gmail.com](mailto:martin.boudou@gmail.com)

14

15 **Abstract**

16 **Background**

17 To constrain propagation and mitigate the burden of COVID-19, most countries initiated and  
18 continue to implement several non-pharmaceutical interventions (NPIs), including national and  
19 regional lockdowns. In the Republic of Ireland, the first national lockdown was decreed on 23<sup>rd</sup> of  
20 March 2020, followed by a succession of restriction increases and decreases (phases) over the the  
21 following year. To date, the effects of these interventions remain unclear, and particularly within  
22 differing population subsets. The current study sought to assess the impact of individual NPI phases  
23 on COVID-19 transmission patterns within delineated population subgroups in the Republic of  
24 Ireland.

25 **Methods and Findings**

26 Confirmed, anonymised COVID-19 cases occurring between the 29<sup>th</sup> of February 2020 and  
27 30<sup>th</sup> November 2020 (n= 72,654) were obtained. Segmented modelling via breakpoint regression  
28 with multiple turning points was employed to identify structural breaks across sub-populations,  
29 including primary/secondary infections, age deciles, urban/commuter/rural areas, patients with  
30 underlying health conditions, and socio-demographic profiles. These were subsequently compared  
31 with initiation dates of eight overarching NPI phases.

32 Five distinct breakpoints were identified. The first breakpoint, associated with a decrease in  
33 the daily COVID-19 incidence, was reported within 14 days of the first set of restrictions in mid-  
34 March 2020 for most population sub-groups. Results suggest that moderately strict NPIs were more

35 effective than the strictest Phase 5 (National Lockdown). Divergences were observed across  
36 population sub-groups; lagged response times were observed among populations >80 years,  
37 residents of rural/ commuter regions, and cases associated with a below-median deprivation score.

## 38 **Conclusions**

39 Study findings suggest that many NPIs have been successful in decreasing COVID-19  
40 incidence rates, however the strictest Phase 5 NPI was not. Moreover, NPIs were not equally  
41 successful across all sub-populations, with differing response times noted. Mitigation strategies and  
42 interventions may need to be increasingly bespoke, based on sub-population profiles and required  
43 responses.

44

## 45 **Introduction**

46 Since its identification in late-2019 in Wuhan China, severe acute respiratory syndrome  
47 coronavirus 2 (SARS-CoV-2), the virus associated with coronavirus disease 2019 (COVID-19), has  
48 rapidly spread across the world [1]. The clinical presentation of infection by SARS-CoV-2 ranges  
49 between asymptomatic infection, mild symptomatic infection, and critical disease, defined by  
50 respiratory and/or multi-organ failure and death [1]. As of late March 2021, almost 127 million cases  
51 had been reported, resulting in approximately 2.8 million deaths [2] including 234,000 cases and  
52 4,650 deaths in the Republic of Ireland (ROI) [3], representing unprecedented rates of hospitalisation  
53 and subsequent pressure on critical care services, both nationally and globally [4,5]. The first  
54 laboratory confirmed-case reported in the ROI was reported on 29<sup>th</sup> February 2020, and within three  
55 weeks, cases had been confirmed in all 26 administrative counties [6]. On March 11<sup>th</sup> 2020, the  
56 World Health Organization declared COVID-19 a global pandemic, almost immediately after which a  
57 multi-faceted approach was adopted by the Irish government to reduce the impacts of the crisis and  
58 “flatten the (epidemic) curve”. As no pharmaceutical intervention was available, this approach  
59 comprised an ensemble of non-pharmaceutical interventions (NPIs), a majority of which were rolled  
60 out nationally, with several regional NPIs (e.g., lockdowns) implemented later in 2020. Measures  
61 included 1.) limiting the spread of the virus in the community via school closures, closing the  
62 hospitality sector and social distancing 2.) contact tracing, 3.) ensuring adequate healthcare services  
63 and equipment available for those most impacted, and 4.) limiting the financial burden on the  
64 population, particularly business owners, arising from mitigation and containment measures [7]. A  
65 comprehensive overview of the key decisions and responses mandated by the Irish government are  
66 presented in Table 1.

67 **Table 1. Time-series of public health responses and non-pharmaceutical interventions (NPIs)**  
 68 **implemented in the Republic of Ireland in response to COVID-19 Pandemic, March – October 2020**

| Date                        | Public Health Response                                                                                                                                                                                                                                                                                                                                                                                                                                                                                                                          | Restriction Increase/Decrease |
|-----------------------------|-------------------------------------------------------------------------------------------------------------------------------------------------------------------------------------------------------------------------------------------------------------------------------------------------------------------------------------------------------------------------------------------------------------------------------------------------------------------------------------------------------------------------------------------------|-------------------------------|
| 9 <sup>th</sup> March 2020  | <ul style="list-style-type: none"> <li>St. Patrick's Day Festival Cancelled by Irish Taoiseach (Prime Minister)</li> </ul>                                                                                                                                                                                                                                                                                                                                                                                                                      | Increase                      |
| 12 <sup>th</sup> March 2020 | <ul style="list-style-type: none"> <li>Mandatory closure of schools, colleges, universities, childcare facilities, and state-run cultural institutions</li> <li>Suspension of indoor gatherings for &gt;100 people and outdoor gatherings for &gt;500 people</li> <li>Workers urged to work from home, where possible</li> </ul>                                                                                                                                                                                                                | Increase                      |
| 15 <sup>th</sup> March 2020 | <ul style="list-style-type: none"> <li>Closure of pubs (bars)</li> </ul>                                                                                                                                                                                                                                                                                                                                                                                                                                                                        | Increase                      |
| 24 <sup>th</sup> March 2020 | <ul style="list-style-type: none"> <li>Closure of non-essential businesses</li> <li>All indoor and outdoor sporting activities cancelled</li> <li>All playgrounds/campgrounds closed</li> <li>Citizens not permitted to take unnecessary travel either within Ireland or overseas</li> <li>Physical distancing required when outside and social gatherings of no more than four individuals allowed (except for members of the same household)</li> <li>Citizens required to work from home unless they worked in essential services</li> </ul> | Increase                      |
| 27 <sup>th</sup> March 2020 | <ul style="list-style-type: none"> <li>Stay at home measures announced for entire population (except essential workers)</li> <li>Confinement radius of 2km from home address implemented</li> <li>No gatherings with anyone outside household</li> <li>People aged over 70 or medically vulnerable advised not to leave own home</li> </ul>                                                                                                                                                                                                     | Increase                      |
| April 9 <sup>th</sup> 2020  | <ul style="list-style-type: none"> <li>Irish Police Service granted legal powers to restrict movement, including arrest without warrant, under the Health Act 1947 (Section 31A-Temporary Restrictions) (Covid-19 Regulations).</li> </ul>                                                                                                                                                                                                                                                                                                      | Increase                      |
| May 18 <sup>th</sup> 2020   | <p><b>Phase 1 of reopening of economy and society</b></p> <ul style="list-style-type: none"> <li>Outdoor work and retail catering for outdoor work resumed</li> <li>Groups of up to four people are allowed to meet outdoors within 5 km of home.</li> <li>Outdoor public amenities, sport and fitness activities are allowed to open.</li> </ul>                                                                                                                                                                                               | Decrease                      |
| June 8 <sup>th</sup> 2020   | <p><b>Phase 2 of reopening of economy and society</b></p> <ul style="list-style-type: none"> <li>Travel within a county or up to 20 km from home if crossing county borders is allowed.</li> <li>Groups of up to six people are allowed to meet either outdoors or indoors.</li> <li>Organised sporting, cultural or social activities for up to 15 people are allowed.</li> <li>Other retail (except within malls/shopping centres) are allowed to open.</li> <li>Funerals with up to 25 people in attendance are allowed.</li> </ul>          | Decrease                      |
| June 15 <sup>th</sup> 2020  | Retail facilities in malls/shopping centres are allowed to open                                                                                                                                                                                                                                                                                                                                                                                                                                                                                 | Decrease                      |

|                                |                                                                                                                                                                                                                                                                                                                                                                                                                                                                                                                                                                                                                                                                                                                                                                              |          |
|--------------------------------|------------------------------------------------------------------------------------------------------------------------------------------------------------------------------------------------------------------------------------------------------------------------------------------------------------------------------------------------------------------------------------------------------------------------------------------------------------------------------------------------------------------------------------------------------------------------------------------------------------------------------------------------------------------------------------------------------------------------------------------------------------------------------|----------|
| June 29 <sup>th</sup> 2020     | <p><b>Phase 3 of reopening of economy and society</b></p> <ul style="list-style-type: none"> <li>• Domestic travel restrictions lifted.</li> <li>• Cafes, restaurants, hotels, hostels, galleries, museums and pubs that serve food are allowed to open but social distancing must be maintained.</li> <li>• Crèches reopen for essential workers and those who need childcare facilities</li> <li>• Behind closed door sporting activities resumed.</li> <li>• Higher risk retail outlets such as hairdressers are allowed to open.</li> <li>• Indoor leisure facilities, festivals and cultural activities reopen.</li> <li>• Indoor gatherings of up to 50 people and outdoor gatherings of up to 200 people allowed as long as public health advice followed.</li> </ul> | Decrease |
| July 15 <sup>th</sup> 2020     | <ul style="list-style-type: none"> <li>• Face masks made mandatory in shops for customers and staff.</li> <li>• Maximum of 10 people from no more than 4 households allowed to visit other people's homes</li> </ul>                                                                                                                                                                                                                                                                                                                                                                                                                                                                                                                                                         | Increase |
| July 20 <sup>th</sup> 2020     | <ul style="list-style-type: none"> <li>• "Green list" of countries published; travellers from these countries can visit Ireland without having to quarantine.</li> <li>• Advice to people living in Ireland is to avoid all non-essential overseas travel.</li> </ul>                                                                                                                                                                                                                                                                                                                                                                                                                                                                                                        | Decrease |
| August 10 <sup>th</sup> 2020   | <p><b>Phase 4 of reopening of economy and society:</b></p> <ul style="list-style-type: none"> <li>• Crèches can reopen for the remaining workers.</li> <li>• Weddings are permitted with limited attendance.</li> <li>• Pubs/Nightclubs to remain closed</li> </ul>                                                                                                                                                                                                                                                                                                                                                                                                                                                                                                          | Decrease |
| August 18 <sup>th</sup> 2020   | <ul style="list-style-type: none"> <li>• Visitors to a home should be limited to not more than 6 from not more than 3 households</li> <li>• Restaurants and Cafes to close by 11:30pm with a maximum of 6 per group (no more than 3 households)</li> </ul>                                                                                                                                                                                                                                                                                                                                                                                                                                                                                                                   | Decrease |
| September 1 <sup>st</sup> 2020 | Primary and Secondary Schools reopen                                                                                                                                                                                                                                                                                                                                                                                                                                                                                                                                                                                                                                                                                                                                         | Decrease |
| October 7 <sup>th</sup> 2020   | <p>Restrictions levels increased to Level 3 (of a 5-point scale), including:</p> <ul style="list-style-type: none"> <li>• Visits to private homes limited to six people from two different households.</li> <li>• Social family gatherings are suspended.</li> <li>• Organized indoor gatherings are suspended while outdoor gatherings are limited to 15 people.</li> <li>• Residents must remain in their counties of residence unless traveling for work, education, or other essential purposes.</li> <li>• Public transport capacity is limited to 50 percent</li> <li>• Restaurants and cafes allowed to remain open for takeaway and delivery</li> </ul>                                                                                                              | Increase |
| October 21 <sup>st</sup> 2020  | <p>Six-week level 5 (most severe) lockdown, except for specific circumstances</p> <ul style="list-style-type: none"> <li>• 5km containment radius introduced</li> <li>• Schools, early learning and childcare services remain open and are deemed essential</li> <li>• Visits to other people's homes or gardens is banned</li> <li>• Bars, cafes, restaurants and wet pubs may provide take-away and delivery services only.</li> <li>• Public transport will operate at 25% capacity for the purposes of allowing those providing essential services to get to work</li> <li>• Essential retail and services to remain open</li> </ul>                                                                                                                                     | Increase |

69

70 In the early phases of the pandemic, a marked age-associated vulnerability in the burden of  
71 disease was established, with COVID-19-associated morbidity and mortality rates significantly higher  
72 among older sub-populations [8,9]. More recently, studies have examined the impact of geographic  
73 location [10], and socioeconomic profile [11] on the likelihood of infection and subsequent  
74 outcomes (e.g., hospitalisation, severe infection, intensive care and mortality).

75 However, while there is little doubt as to the overarching efficacy of NPIs “flattening the  
76 curve” in the ROI and ensuring that healthcare systems remained intact, to date, it remains unclear  
77 how effectively individual measures (intervention phases) reduced viral transmission, and if  
78 measures were analogously efficacious among all population subsets and geographical regions.  
79 Accurate and reliable analyses of the epidemiology of COVID-19 as it relates to NPIs is essential for  
80 informing ongoing healthcare provision and future public health emergency planning. As such, the  
81 current study applied breakpoint linear regression analyses with multiple breakpoints to calculated  
82 daily incidence time-series for all symptomatic, laboratory-confirmed cases of COVID-19 among the  
83 Irish population from February 29<sup>th</sup> to November 30<sup>th</sup> 2020. Subsequently, identified structural  
84 breaks emanating from delineated sub-populations (primary/secondary infection, age deciles,  
85 urban/commuter/rural, deprivation median, and patients with underlying health conditions) were  
86 compared with eight time-specific NPIs, accounting for the World Health Organisations (WHO) mean  
87 (5-day) and maximum (14-day) estimated COVID-19 incubation periods. We aimed to longitudinally  
88 estimate the efficacy, lag-period, and increasing/decreasing slope associated with specific NPIs  
89 among delineated sub-populations, with a view to providing governmental and public health  
90 authorities with a robust evidence-base for current, ongoing and future public health emergencies.

91

## 92 **2. Methods**

### 93 **2.1 Case Data**

94 Anonymised notified COVID-19 case data were obtained from the Computerised Infectious  
95 Disease Reporting (CIDR) database (<http://www.hpsc.ie/CIDR/>), an information system used for the  
96 collation of notifiable (communicable) infection data in Ireland [12]. Address level data had already  
97 been geocoded to Small Areas by the Health Service Executive (HSE)-Health Intelligence Unit. COVID-  
98 19 incidence time-series were developed based on the “epidemiological date” (EpiDate) include in  
99 the HSE COVID-19 Case Surveillance Form.

100

## 101 Inclusion criteria

102 Due to the evolving testing policy since the start of the pandemic, only symptomatic cases  
103 were included for analyses. Accordingly, all laboratory confirmed cases, occurring between 29<sup>th</sup>  
104 February and 30<sup>th</sup> November 2020, with symptoms consistent with the Health Protection  
105 Surveillance Centre (HPSC) COVID-19 interim case definition (Version 6, January 27<sup>th</sup> 2021) [13] were  
106 included for analyses. Accordingly, cases associated with detection of SARS-CoV-2 nucleic acid  
107 or antigen in a clinical specimen (Laboratory criteria), and exhibiting at least one of the following:  
108 sudden onset of cough or fever or shortness of breath or anosmia, ageusia or dysgeusia (Clinical  
109 criteria, i.e. “symptomatic”) were included.

110

## 111 Ethical considerations

112 Research ethical approval for use of the COVID-19 dataset and associated analyses were  
113 granted by the National Research Ethics Committee for COVID-19-related Health Research (NREC  
114 COVID-19) (Application number: 20-NREC-COV-061)

115

## 116 2.2 Data Subsetting

117 Sporadic (i.e., not recorded as associated with a confirmed outbreak or cluster) and  
118 outbreak index cases (the first case identified as part of a recognised outbreak/cluster) were defined  
119 as primary cases, while all other known outbreak cases were defined as secondary cases.

120 Further, cluster incidence rate (based on CIDR outbreak code, with cluster initiation taken as  
121 the epidemiological date (EpiDate) attributable to second case within a defined cluster) per day was  
122 also defined and forwarded for analyses. Several metrics were additionally attributed to all  
123 individual clusters, including mean case age (years), mean duration (days) and mean size (case  
124 number) to investigate the effect of NPIs on cluster composition. All primary symptomatic cases of  
125 COVID-19 were discretized into decile-based age-groups for further analyses of age-based sub-  
126 populations and their responses to NPIs.

127

### 128 *Urban/Rural Classification*

129 A categorical SA-specific settlement type variable with three levels of classification was  
130 developed using data obtained from the Irish Central Statistics Office (CSO). The CSO settlement  
131 type dataset comprises six categories classified along an urban/peri-urban/rural scale ranging from  
132 ‘city’ (1) to ‘highly rural/remote areas’ (6). The classification variable was coded such that any  
133 classification which included a built-up area (classification 1 to 4) was recoded as ‘urban’,

134 classification 5 (rural areas with high urban influence) was recoded as commuter/peri-urban, with all  
135 other areas (classification 6) coded as 'rural'.

136

### 137 *Deprivation index*

138 The Pobal Haase Pratschke (HP) Deprivation Index is derived from 16 individual components  
139 representing the three main dimensions of deprivation: demographic profile, social class  
140 composition, and labour market situation [14] (Supplementary Table S1). The relative index score  
141 represents a composite measure of deprivation based on these components, calculated for each CSO  
142 Small Area (SA) and measured on a single scale across all census periods (Supplementary Table S2),  
143 with the score acting as a comparative measure of deprivation between SAs during a census period  
144 [14]. Deprivation index data were obtained for 2016 (the most recent Irish census) to correspond  
145 with the study period, and binary classification used to delineate SAs based on high (above median  
146 relative score) and low (below median relative score) socioeconomic profile.

147 All datasets (urban/rural, deprivation) were spatially integrated using a unique SA identifier  
148 via the *match()* function (i.e., input vector), with subset-specific daily incidence rates calculated using  
149 the *ts()* function in R version 4.0.3 [15]

150

## 151 **2.2 Non-pharmaceutical Interventions in the Republic of Ireland, March – November 2020**

152 As shown (Table 1), 16 NPI periods occurred during the study period, however, as several of  
153 these were relatively minor and/or regionally specific, 8 primary time points were selected for  
154 comparison, based on the 5-phase COVID-19 Plan: Roadmap for Reopening Society and Business,  
155 published by the Irish Government in June 2020 (Table 2).

156

157

158

159

160

161

162

163

164

165

166

167

168 **Table 2. Non-pharmaceutical Intervention (NPI) phases in the Republic of Ireland, March –**  
169 **November 2020**

| Date | Restrictions | Phase Equivalent |
|------|--------------|------------------|
|------|--------------|------------------|

|            |                                                                                                            |   |
|------------|------------------------------------------------------------------------------------------------------------|---|
| 15/03/2020 | Schools (12th) and Bars closed                                                                             | 4 |
| 27/03/2020 | Stay At Home (SAH) Order – Full P5Lockdown                                                                 | 5 |
| 18/05/2020 | Easing of COVID-19 P5 – Non-essential shops open – Outdoor sports and mixing with 4 people (max) permitted | 4 |
| 08/06/2020 | Easing of COVID-19 P4 - Indoor and outdoor mixing up to 6 (max) people permitted                           | 3 |
| 29/06/2020 | Dry pubs/restaurants/barbers/indoor exercise permitted                                                     | 2 |
| 18/08/2020 | 15/6 people mixing restrictions outdoor/indoor                                                             | 2 |
| 06/10/2020 | P3 Restrictions implemented nationwide                                                                     | 3 |
| 21/10/2020 | P5 Lockdown - Six weeks                                                                                    | 5 |

170

171

## 172 2.3 Analytical Methods

173 Segmented modelling via breakpoint regression is a useful tool for assessing the effect of a  
 174 covariate  $x$  on the response  $y$  when  $x$  changes at a value within the range of the covariate. The  
 175 breakpoint regression model has been widely used in medical and related research including  
 176 mortality time-series [16], cancer incidence [17], and medication usage [18]. Parameter estimates  
 177 and breakpoint estimates were calculated using the "segmented" package [19]. Generic linear  
 178 models (seg.Z) were fit to delineated time-series (i.e., sequence of daily COVID-19 incidence through  
 179 days 1:276, with the segmented() function employed to fit piecewise regressions based on distance  
 180 (i.e.,  $\gamma$  divergence/error function), with the model converging when  $\gamma$  is minimized. Stochastically,  
 181 breakpoint regression models for sample subsets were defined as  $(x_t, y_t, t = 1, 2, \dots, n)$ , with:

182

$$183 y_t = \begin{cases} m(x_t, \beta(1)), & a \leq x_t \leq r \\ m(x_t, \beta(2)), & r < x_t \leq b \end{cases} \quad (1)$$

184

185 where  $\beta_x$  represents the slope of the regression line(s), thus determining the increasing or  
 186 decreasing trend of the disease for each time interval. In the current study, multiple breakpoints  
 187 were identified, with the breakpoint linear regression model defined as:

188

$$189 y_t = \beta_0 + \beta_1 x_t + \delta_1 (x_t - \tau_1) + \dots + \delta_k (x_t - \tau_k) + \epsilon, \quad t = 1, 2, \dots, n \quad (2)$$

190

191 where  $x_t$  is "day number", with  $\tau_s$ 's ( $s = 1, 2, \dots, k$ ) representing the breakpoints. In this case,  $k$   
 192 breakpoints divide the time into  $(k + 1)$  intervals (or sections), and the interval gradients associated  
 193 with these intervals are  $\beta_1$  (first slope,  $x_t < \tau_1$ ),  $\beta_2 = \beta_1 + \delta_1$  (second slope), etc. An iterative  
 194 approach was taken to optimise breakpoint number via increasing the npsi parameter from 1, up to  
 195 a maximum of 10, using the adjusted  $R^2$  value to balance acceptable model fit with model



196 parsimony, for ease of interpretation, thus providing a number (npsi) of optimised breakpoints with  
 197 a sequence date (from 1 to 276, i.e., length of the time series), matched to the corresponding date  
 198 and associated (n + 1) linear intervals and corresponding interval slope. Identified breakpoints and  
 199 associated sections were subsequently plotted and compared with national level NPI phases (Table  
 200 2), using the World Health Organisations (WHO) mean (5-day) and maximum (14-day) estimated  
 201 COVID-19 incubation periods.

202

### 203 3. Results

204 Overall, 47,928 COVID-19 cases (25,651 female (53.5%); mean age 41.2 years) were included  
 205 for individual (i.e., case-by-case) breakpoint analyses (65.9% of all notified cases), of which 61.5% (n  
 206 = 29,459) of cases were classified as primary, and 18,469 (38.5%) classified as secondary cases. The  
 207 entire dataset (N = 72,311, i.e., both symptomatic and asymptomatic) was included for breakpoint  
 208 analyses of cluster number per day, based on the first reported epi-date associated with each  
 209 cluster.

210 Approximately 98.6% of symptomatic cases (n = 47,265) were successfully geocoded to one CSO SA,  
 211 of which 15.3% (n = 7339), 70.8% (n = 33,950) and 12.5% (n = 5976) of cases were assigned to rural,  
 212 urban and commuter/peri-urban categories, respectively; 1231 cases (2.6%) were associated with  
 213 international travel. A median relative deprivation score of 0.870 (Minimum -36.18, Maximum 40.47;  
 214 25<sup>th</sup> and 75<sup>th</sup> percentiles: -6.42, 7.59) was used for case designation.

215

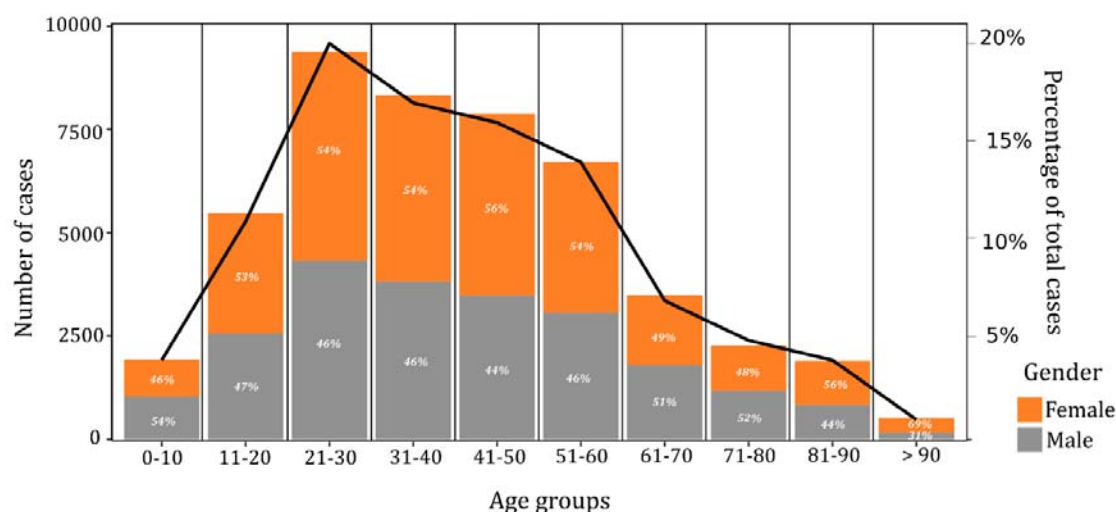

216

217

218 **Figure 1. Age and gender distribution of symptomatic COVID-19 cases in the Republic of Ireland,**  
 219 **February 29<sup>th</sup> – November 30<sup>th</sup> 2020 (crude cases and percentage)**

220

220

221 **Breakpoint Models**

222 Case subsets were modelled to identify the best psi (breakpoint number) for use in  
 223 breakpoint analyses (Table 3). A high degree of fit (minimum adjusted  $R^2 = 0.833$ ) was found among  
 224 all modelled subsets using psi = 5; while psi = 9 was found to result in higher fit values for several  
 225 subsets ( $n = 7$ ), findings of psi = 5 for all subsets are presented to increase comparability and clarity.

226  
 227

228 **Table 3. Case subsets, associated sample number and results of breakpoint modelling (based on 5**  
 229 **breakpoints), N = 47,928**

| Case Subset                  | Number of cases in subset | Adj. $R^2$ |
|------------------------------|---------------------------|------------|
| Primary                      | 29,459                    | 0.925      |
| Secondary                    | 18,469                    | 0.919      |
| Notified Case Clusters       | 8581                      | 0.923      |
| Underlying Health Conditions | 15,079                    | 0.895      |
| 0-10 Years                   | 1933                      | 0.883      |
| 11-20 Years                  | 5488                      | 0.882      |
| 21-30 Years                  | 9380                      | 0.889      |
| 31-40 Years                  | 8332                      | 0.916      |
| 41-50 Years                  | 7883                      | 0.904      |
| 51-60 Years                  | 6714                      | 0.91       |
| 61-70 Years                  | 3494                      | 0.87       |
| 71-80 Years                  | 2270                      | 0.84       |
| 81-90 Years                  | 1907                      | 0.889      |
| >90 Years                    | 518                       | 0.833      |
| Rural                        | 7339                      | 0.921      |
| Urban                        | 33,950                    | 0.933      |
| Mixed/Commuter               | 5976                      | 0.848      |
| High Deprivation             | 23,624                    | 0.93       |
| Low Deprivation              | 23,641                    | 0.923      |

230

231 As shown (Table 3, Figure 2), while both primary and secondary case time-series achieved  
 232 high degrees of fit via breakpoint modelling with psi = 5 (both  $R^2 > 0.9$ ), differing patterns were  
 233 identified. The first breakpoint identified within the primary case time-series (29/03) occurred within  
 234 5 days of NPI Phase 4 (Figure 2a), while this occurred markedly later within the secondary case time  
 235 series (23/04), and not within 14 days of the introduction of any NPI (Figure 2b). The first three  
 236 breakpoints associated with secondary cases occurred over a significantly shorter time-period than  
 237 observed within primary cases; a marked increase in secondary cases occurred within 14 days  
 238 (02/09) of a relaxing of restrictions in mid-August (18/08) 2020, with this increase occurring  
 239 approximately 3 weeks earlier among primary cases (07/08) (Figure 3). Both primary and secondary  
 240 incidence rates exhibited a marked decrease within 5 days of the move from NPI Phase 2 to Phase 3

241 being implemented nationwide on 6<sup>th</sup> October; no breakpoint followed by a marked and consistent  
242 case decrease was identified within 5 or 14 days of either nationwide Phase 5 lockdowns.

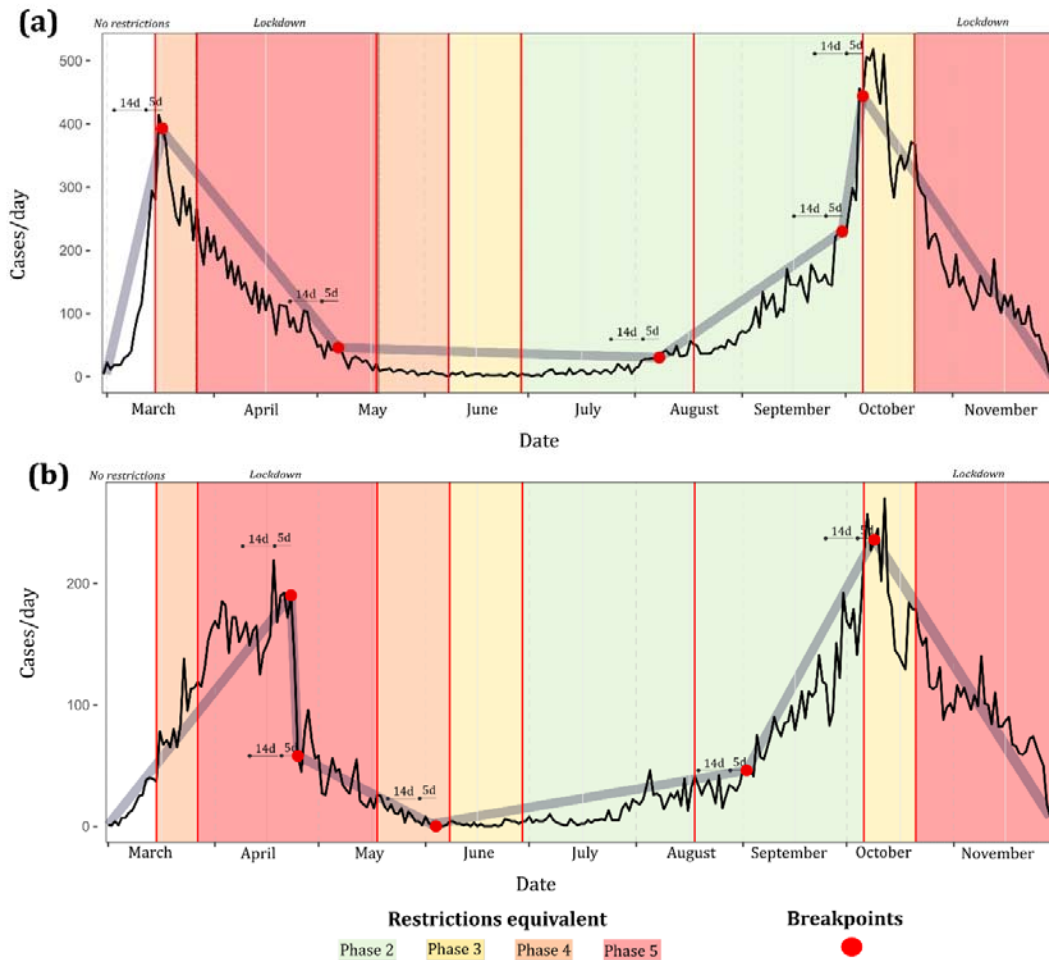

243  
244 **Figure 2. Breakpoint models ( $\psi = 5$ ) for a.) primary symptomatic COVID-19 and b.) secondary**  
245 **symptomatic COVID-19 in the Republic of Ireland (cases/day), February 29<sup>th</sup> to November 30<sup>th</sup>**  
246 **2020**  
247

248  
249  
250  
251  
252

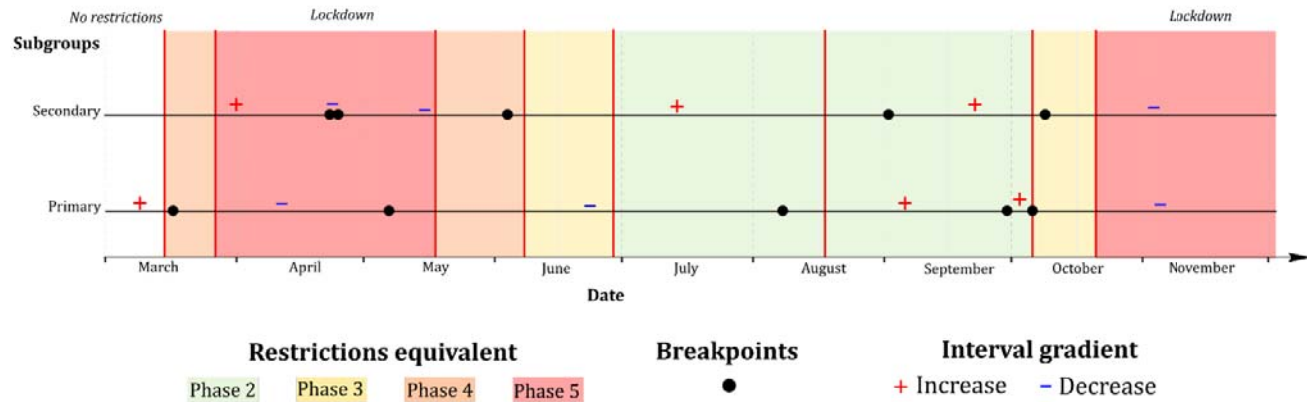

253  
254  
255  
256  
257  
258

Figure 3. Grid synthesis of primary and secondary time-series breakpoint models ( $\psi = 5$ ) in the Republic of Ireland (cases/day), February 29<sup>th</sup> to November 30<sup>th</sup> 2020; + and - signs refer to positive and negative interval gradients, respectively

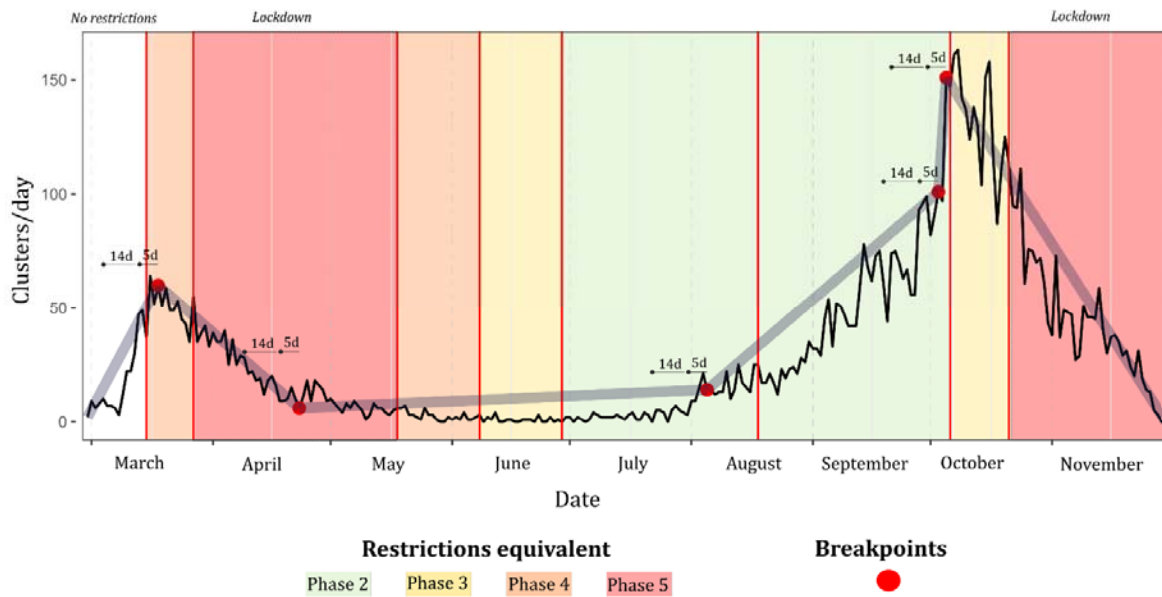

259  
260  
261  
262  
263  
264  
265  
266  
267  
268  
269  
270  
271  
272

Figure 4. Breakpoint model ( $\psi = 5$ ) for notified COVID-19 clusters in the Republic of Ireland (based on first reported epi-date), February 29<sup>th</sup> to November 30<sup>th</sup> 2020

273 **Table 4. Results of breakpoint modelling for COVID-19 clusters per day, with associated median**  
274 **within-cluster age and mean cluster size**

| Breakpoint Model Section | Start Date | End Date   | Cluster Number | Median within-cluster age | Mean Cases/Cluster | Phase Duration (days) |
|--------------------------|------------|------------|----------------|---------------------------|--------------------|-----------------------|
| 1                        | 29/02/2020 | 18/03/2020 | 453            | 47.33                     | 10.34              | 18                    |
| 2                        | 18/03/2020 | 23/04/2020 | 1085           | 45.00                     | 7.07               | 36                    |
| 3                        | 23/04/2020 | 05/08/2020 | 421            | 37.33                     | 5.20               | 104                   |
| 4                        | 05/08/2020 | 03/10/2020 | 2546           | 34.00                     | 4.18               | 59                    |
| 5                        | 03/10/2020 | 05/10/2020 | 248            | 33.83                     | 4.07               | 2                     |
| 6                        | 05/10/2020 | 30/11/2020 | 3828           | 32.50                     | 3.57               | 56                    |

275

276 The breakpoint model associated with cluster number per day (Figure 4) was relatively  
277 similar with respect to breakpoint location and interval gradient as that developed for primary cases.  
278 For example, the first identified breakpoint (18/03) leading to a consistent decline occurred within 5  
279 days of initiation of Phase 4 closures, with another similar breakpoint identified one day before  
280 Phase 4 re-entry on October 6<sup>th</sup>. Again, no breakpoint followed by a decline in cluster occurrence  
281 were identified during or within 14 days of Phase 5 lockdowns. As shown (Table 4), no discernible  
282 pattern was observed with respect to breakpoint/interval order and cluster number, however, a  
283 notable monotonic decline in median within-cluster age (e.g., Interval 1 – Median Age 47.3 years;  
284 Interval 6 – Median Age 32.5 years) and cluster size (e.g., Interval 1 – Mean Cases/Cluster 10.3,  
285 Interval 6 – Mean Cases/Cluster 3.6).

286 Symptomatic COVID-19 cases among individuals with underlying health conditions based on  
287 the HSE COVID-19 Case Surveillance Form (chronic heart disease, hypertension, chronic neurological  
288 disease, chronic respiratory disease, chronic kidney disease, chronic liver disease, asthma requiring  
289 medication, immunodeficiency (including HIV), diabetes, BMI  $\geq 40$ , cancer/malignancy) exhibited a  
290 distinctive breakpoint pattern (Figure 5). As for primary cases, secondary cases, and cluster number,  
291 the first identified breakpoint occurred relatively close to the 15/03 Phase 4 NPI, albeit not within  
292 the 5-day median incubation period (23/03). However, “relaxing” of NPIs from Phase 3 to 2 (29/06;  
293 18/08) both coincided (within 14-days) with breakpoints followed by increasing daily incidence rates.  
294 The second wave peak and overarching pattern associated with this population subset was markedly  
295 different from that observed among other sub-populations.

296

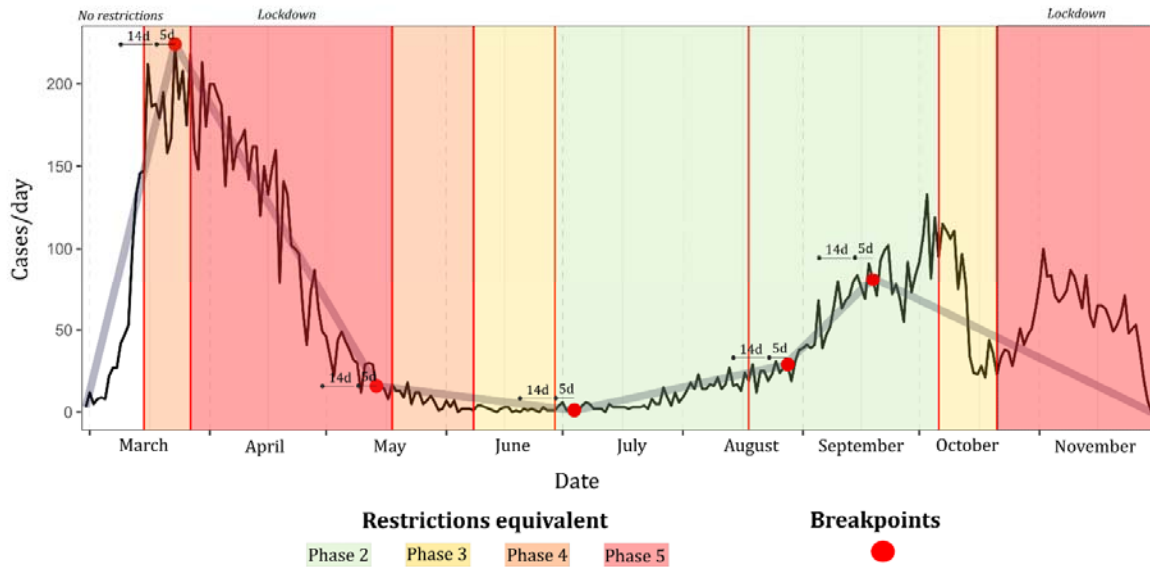

297

298 **Figure 5. Breakpoint model ( $\psi = 5$ ) for symptomatic COVID-19 in the Republic of Ireland among**  
 299 **persons with underlying health conditions (cases/day), February 29<sup>th</sup> to November 30<sup>th</sup> 2020**

300

301

302

303

304

305

306

307

308

309

310

311

312

313

314

315

316

317

318

319

320

321

All age deciles from 0-10 up to 71-80 years inclusive exhibited a first breakpoint occurring within the NPI Phase 4 (15/03 to 27/03), with an age-ordered pattern observed (i.e., younger deciles exhibited breakpoint before older deciles) (Figure 6a). The two oldest subsets, namely 81-90 years and >90 years, did not adhere to this pattern however, with an approximate 25-days gap between the first identified breakpoint among both these deciles and the 71–80-year decile. Both the 81-90 years and >90 years sub-populations exhibited markedly different breakpoint patterns over the duration of the study period. Conversely, while an age-ordered pattern was also identified for 2<sup>nd</sup> breakpoints, higher age deciles typically exhibited turning points prior to younger counterparts. For example, among 61–70-year-olds, a second breakpoint was identified 10 days (08/05) before easing of the first Phase 5 lockdown (18/05), while this breakpoint occurred one week after easing among the 31–40-year decile (23/05). All age-based sub-populations exhibited a breakpoint followed by a negative interval gradient (Range -0.18 - -2.8) within 14 days of nationwide Phase 3 restrictions (06/10), with no breakpoints identified during the ensuing Phase 5 lockdown (21/10 onwards).

A similar pattern was observed between identified breakpoints based on urban/rural classification during the first half of the study period (February-August) (Figure 6b), for example, while the second identified breakpoint among urban cases occurred slightly earlier (25/05) than among cases residing in rural (30/05) or commuter areas (29/05), these differences were relatively minor, with all three breakpoints, followed by low positive gradient intervals (Range 0.16 – 0.57), occurring within 14 days of Phase 5 easing (18/05). The most significant divergence from this pattern was represented by the third identified breakpoint, all of which were followed by positive gradient

322 intervals (1.35-5.05), which occurred on 21/08 within the urban case time-series, and approximately  
 323 two weeks later in rural (08/09) and commuter areas (07/09).

324 As shown (Figure 6c), breakpoints identified within the sub-population associated with the  
 325 “above-median” (i.e., low) deprivation score ( $> 0.87$ ) typically occurred prior to or in concurrence  
 326 with those associated with a deprivation score  $< 0.87$ . For example, the first identified breakpoint  
 327 within the low deprivation sub-population occurred on 16/03 (one day after P4 initiation), while the  
 328 first high-deprivation breakpoint occurred one week later (23/03). Similarly, the second low-  
 329 deprivation breakpoint occurred one day after Phase 5 easing (19/05), while this breakpoint  
 330 occurred one week later among those residing in high-deprivation SAs (26/05), thus indicating that  
 331 NPI responses occurred more rapidly within low-deprivation areas in the early phases of the  
 332 pandemic, with this pattern dissipating over time.

333

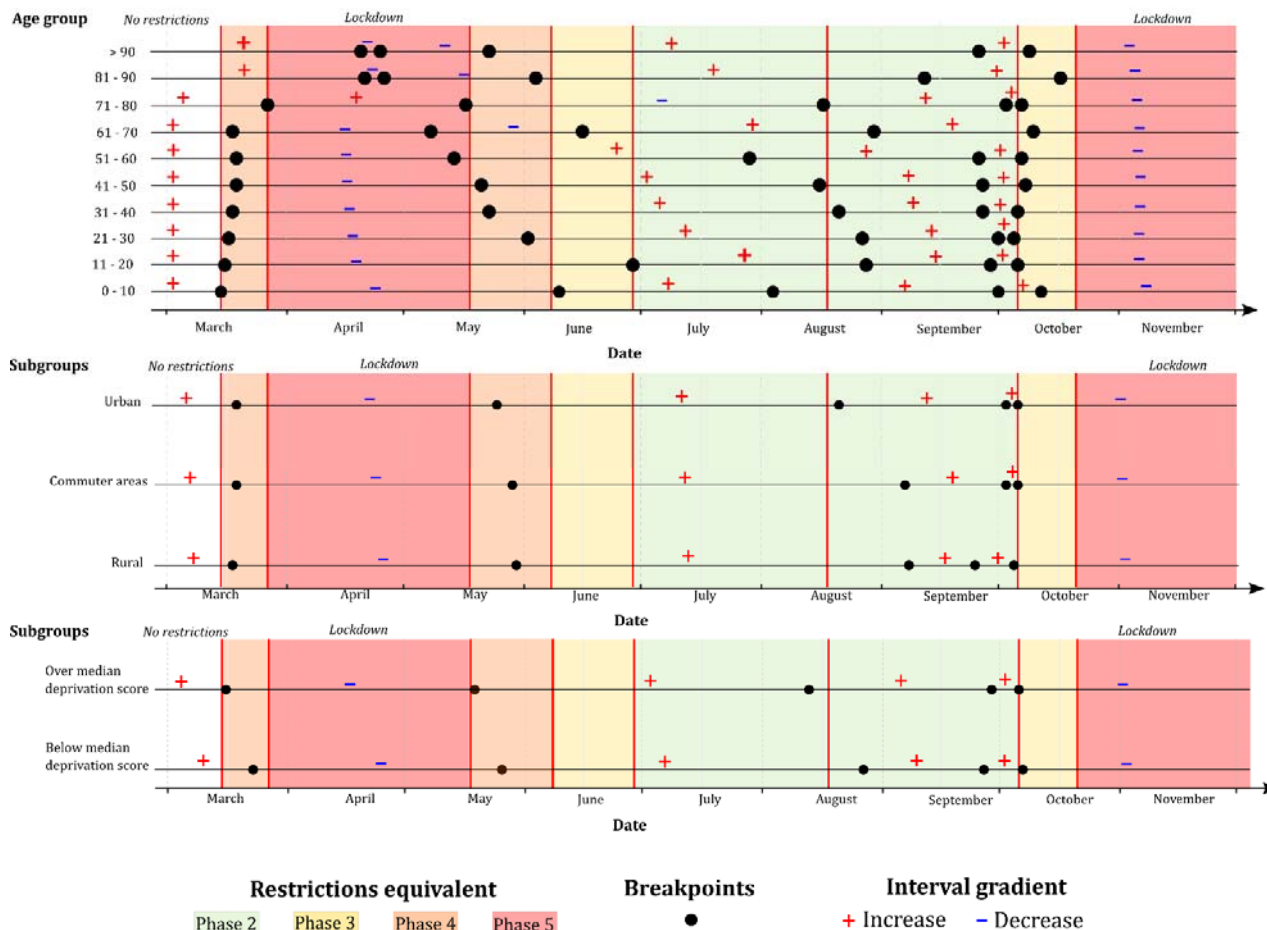

334

335 **Figure 6. Grid synthesis of (top) age-related deciles, (middle) urban/commuter/rural classification,**  
 336 **and (bottom) above/below median deprivation score time-series breakpoint models ( $\psi = 5$ ) in**  
 337 **the Republic of Ireland (cases/day), February 29<sup>th</sup> to November 30<sup>th</sup> 2020; + and - signs refer to**  
 338 **positive and negative interval gradients, respectively**

#### 339 4. Discussion

340 Results may offer valuable insight into the mechanisms of virus suppression and their  
341 efficacy across sub-populations, geographic regions and sociodemographic profiles. Five distinct  
342 breakpoints were identified and compared across the study period, which consisted of eight varying  
343 (increasing/decreasing stringency) stages of non-pharmaceutical intervention. The initial identified  
344 breakpoint among a majority of case subsets (excluding secondary infections, and infection among  
345 those >80 years) followed by a significantly negative interval gradient, occurred within 14 days of the  
346 implementation of the first set of restrictions in mid-March 2020, indicating that there was extensive  
347 'voluntary' societal change approaching the implementation of restrictions. This is likely reflective of  
348 the socially perceived 'high risk' at the time, due to the unprecedented media exposure and scale of  
349 the unfolding event, resulting in high compliance behavioural change (e.g., handwashing, social  
350 distancing, staying at home etc.). This effect has been recently reported, whereby restaurant  
351 reservations in the United States and movie releases and revenues in Sweden were shown to reduce  
352 significantly before any imposition of NPIs, not as a direct response. Thus the largest proportion of  
353 decreased mobility in both countries during the initial stages of the pandemic was voluntary, driven  
354 by the number of COVID-19 cases and proxying for greater awareness of risk, with the total  
355 contribution of NPIs moderate compared to voluntary actions [20].

356 All identified second breakpoints occurred between mid-April and mid-May, after which  
357 COVID-19 incidence rates remained low and consistent for 2-3 months, despite eased restrictions  
358 (i.e., Phase 2). Previous studies have shown that respiratory viruses, including coronaviruses, exhibit  
359 significantly lower incidence rates of infection during summer, and particularly in temperate regions  
360 such as Ireland, with colder conditions during winter a major driver for respiratory tract infections  
361 due to increased virus stability and transmission and a weakened host immune system [21].  
362 Additionally, Merow & Urban (2020) posit that increased UV radiation (viral inactivation) in  
363 conjunction with increased vitamin D production (via increased UV radiation) may play a key role,  
364 particularly when combined with ongoing voluntary social precautions; models suggest that up to  
365 36% of the variation in maximum COVID-19 growth rates in the US is attributed to weather, with UV  
366 light the most strongly associated climatic variable with lower COVID-19 growth rates [22].

367 The fourth identified breakpoint within all subsets marked a significant and abrupt increase  
368 of infection rates from mid to late September 2020, likely attributable to the reopening of schools  
369 (both primary and secondary) and the return of college/university students to campus  
370 accommodation. Focusing on primary and secondary education which was reinstated with strict  
371 procedural guidance (e.g., 'pods' consisting of 6 children/teens), research from Ireland has  
372 concluded that there is no evidence of secondary transmission of COVID-19 from children attending



373 school [23]. However, the reopening of schools likely resulted in increased social interaction  
374 between parents/caregivers. Moreover, Santamaria & Hortal (2020) suggest that numerous  
375 pandemic waves and consequent NPI phases may lead to lapsing vigilance associated with fatigue or  
376 lowered risk perception [24]. In response to the increasing number of notifications in line with  
377 breakpoint four, the final breakpoint (significant negative interval gradient across all subsets)  
378 occurred simultaneously with the move to Phase four of the national response plan, again indicating  
379 a natural reduction in disease prevalence prior to a mandated NPI, perhaps resulting from an  
380 increased social perception of risk and reinforced personal protective measures. The re-introduction  
381 of increasingly restrictive NPIs immediately after this period was arguably unnecessary; notably no  
382 significant reduction breakpoint were identified during either of the ‘high-level’ (i.e, Phase 5) NPI  
383 phases, as the ‘voluntary’ reduction of disease was likely already triggered. While several  
384 mathematical modelling studies and meta-analyses have reported a marked reduction in COVID-19  
385 incidence and mortality [25 - 27], a meta-analysis of 87 regions which include 3741 pairwise  
386 comparisons could not explain if COVID-19 mortality is reduced by “stay at home” orders in 98% of  
387 the comparisons [28]. Analysis of incidence trends in Germany detected a crucial breakpoint on 8  
388 March, coinciding with the cancellation of mass events on the same day, with the authors suggesting  
389 that increased awareness and voluntary changes in behaviour, e.g., social distancing, respiratory  
390 etiquette and hand hygiene, likely had a significant effect [29]. Similarly, breakpoint analysis of daily  
391 incidence and effective reproductive number in Spain indicates reductions in disease growth that  
392 preceded mobility restrictions [24], while Post et al. (2021) also report findings from a study of seven  
393 European countries that adopted different strategies, which found that, although breakpoints in  
394 daily effective contact rates (ECR) aligned with government interventions, ECR after full lockdown  
395 was not necessarily lower than that after a ban on gatherings alone [30]. As such, it appears that the  
396 efficacy of Phase 5 lockdowns may be regionally- or nationally-specific, and in the case of Ireland,  
397 there is no evidence to suggest that Phase 5 NPIs were more effective than Phase 3/4 NPIs during  
398 the first two “waves” of infection. Considering the potential impacts of prolonged restrictions on  
399 psychological wellbeing [31,32], significant further work and a robust evidence base is required to  
400 support future use of these measures.

401 Breakpoints identified among both secondary cases and recognised COVID-19 clusters  
402 differed from patterns observed among primary cases (Figures 3 & 4); within the cluster number  
403 subset, breakpoints preceded lockdown by a week or more in both first and second wave, while the  
404 crucial breakpoint identified for secondary cases during the first wave did not occur until three  
405 weeks after the lockdown was imposed. This may indicate that measures required to control  
406 outbreaks may differ from those required to control transmission within the general population.

407 Likewise, when cases are assessed based on age profile (Figure 6), notable divergence from an  
408 overarching pattern was observed; a notable decrease in “quick” response was noted among  
409 individuals >80 years i.e., a reduction in the number of cases occurred significantly more quickly  
410 among the population <80 years. This could be attributable to numerous factors including a longer  
411 incubation period in older adults [9], comorbidity-related severity of infection and reduced immune  
412 response [33], all of which may allow for a lengthened persistence of the disease within elderly  
413 populations. The history of the pandemic indicates that nursing homes, or ‘long-term care facilities’  
414 (LTCF) for older people, in Ireland as in other countries, were severely impacted during the first wave  
415 [3], which required specific outbreak control measures within these facilities to break the chain of  
416 transmission. As these infections occurred within the LTCF setting, they were not amenable to the  
417 effects of NPI’s implemented in the general population. Similarly, COVID-19 incidence rate  
418 breakpoints were significantly staggered based on age decile, with case incidence decreases  
419 occurring in younger populations first (approximately 1-3 days per decile), and case increases  
420 occurring more quickly among older individuals (approximately 2-5 days per decile).

421 The timing of the third identified breakpoint differed between urban and rural subgroups,  
422 occurring in mid-August in the urban subgroup and not until approximately 7<sup>th</sup> September in the  
423 rural subgroup. This may be reflective of differences in social activities, e.g., an earlier seasonal  
424 increase in indoor gatherings among urban versus rural residents and/or condensed residences in  
425 urban areas expediting SAR-CoV-2 transmission. A recent study from South Carolina reports that  
426 relaxing of NPIs was followed by hotspots of infection reappearing in urban areas more quickly than  
427 rural areas [34], with the authors recommending locally- or regionally-customised actions to ensure  
428 highest levels of efficacy in controlling the infection. The authors feel that it is likely that there are  
429 more ‘office’ based jobs in urban areas, thus offering more opportunity for working from home,  
430 however data were not available to test this hypothesis. Henning-Smith et al. (2020) suggest that in  
431 many high-income countries, rural residents are older, more likely to be associated with underlying  
432 health conditions, and less likely to have access to healthcare and/or necessary financial resources  
433 [35], and as such, a “one size fits all” approach to NPIs may not be appropriate based upon  
434 geographic location, which in Ireland is associated with many potential drivers including occupation,  
435 income, car ownership, educational attainment, and level of affluence [36]. It is important to note  
436 that, within the symptomatic COVID-19 case dataset for Ireland, a significant association exists  
437 between rurality and deprivation; rural cases were associated with a median HP Deprivation Score of  
438 -8.25, while urban cases exhibited a median deprivation score of -3.22, and as such, it is difficult to  
439 comment on or make recommendations solely based on geographic location. Similarly, an inter-  
440 relationship exists between deprivation and underlying health (based on underlying health condition

441 number associated with confirmed cases) in Ireland, further complicating the situation; when people  
442 without an underlying health condition were excluded, a significant negative non-parametric  
443 correlation existed between deprivation score and health condition number (Spearman Rho = -  
444 0.096,  $p < 0.001$ ).

445 The observed earlier first breakpoint among cases associated with a higher deprivation score  
446 (i.e., more affluent subset) may indicate a greater awareness and willingness to adopt voluntary  
447 measures for self-protection, while working from home (and thus complying with stay-at-home  
448 orders) may be more difficult for those in lower paid jobs. Conversely, the earlier timing of second  
449 and third breakpoints may point to higher levels of susceptibility among more deprived sub-  
450 populations, based on underlying health status, as mentioned above. A recently published  
451 retrospective cohort study comprising 3528 patients with laboratory confirmed COVID-19 residing in  
452 New York (US) found that patients associated with high poverty areas were significantly younger,  
453 had a higher prevalence of comorbidities and were more likely to be female or from a racial minority  
454 compared to individuals living in low poverty areas [37].

455 While the presented study is the first of its kind from Ireland, insofar as it the first to employ  
456 temporally-specific case data, geo-coded to a very fine resolution, thus allowing delineation of  
457 cohorts pertaining to geographical attributes including deprivation and urban/rural classification,  
458 there are some inherent limitations the authors feel should be highlighted. The epi-date used to  
459 develop sub-population time-series, while complete, included a number of temporal classifications;  
460 while a large majority of epi-dates were classified as being “infection onset date”, other case epi-  
461 dates were classified as “lab specified collection date”, “event creation date”, and “date of  
462 diagnosis”. Accordingly, presented findings should be interpreted with an appropriate level of  
463 caution. Similarly, it was not possible to accurately delineate large LTCH or workplace outbreaks,  
464 which may influence, and potentially bias, the number of cases attributed to specific population  
465 subsets e.g., urban/commuter/rural classification. Lastly, COVID-19 surveillance data may be biased  
466 due to geographical distribution of testing locations, and particularly as they pertain to secondary  
467 and/or asymptomatic cases. Consequently, it is important to note that cluster number, median  
468 within-cluster age and cluster size (i.e, notified cases per cluster) were inherently influenced by the  
469 availability of testing for asymptomatic individuals, and particularly during the early phases of the  
470 pandemic.

471

## 472 **References**

- 473 1. World Health Organisation (2020) Coronavirus disease (COVID-19). World Health  
474 Organization. Published 12<sup>th</sup> October 2020. Available at: [https://www.who.int/news-  
475 room/q-a-detail/coronavirus-disease-covid-19](https://www.who.int/news-room/q-a-detail/coronavirus-disease-covid-19) [Accessed 3rd March 2021]

- 476 2. World Health Organisation (2021) Coronavirus disease (COVID-19) pandemic. World Health  
477 Organisation. Available at: [https://www.who.int/emergencies/diseases/novel-coronavirus-](https://www.who.int/emergencies/diseases/novel-coronavirus-2019)  
478 [2019](https://www.who.int/emergencies/diseases/novel-coronavirus-2019) [Accessed 23rd March 2021]
- 479 3. Department of Health (2021) Latest updates on COVID-19. Government of Ireland. Available  
480 at: <https://www.gov.ie/en/news/7e0924-latest-updates-on-covid-19-coronavirus/> [Accessed  
481 28<sup>th</sup> March 2021]
- 482 4. Legido-Quigley H, Asgari N, Teo YY, Leung GM, Oshitani H, Fukuda K, et al. Are high-  
483 performing health systems resilient against the COVID-19 epidemic? *Lancet*.  
484 2020;395(10227):848–50.
- 485 5. Verelst, F., Kuylen, E., & Beutels, P. (2020). Indications for healthcare surge capacity in  
486 European countries facing an exponential increase in coronavirus disease (COVID-19) cases,  
487 March 2020. *Eurosurveillance*, 25(13), 2000323.
- 488 6. HPSC (2020) Epidemiology of COVID-19 in Ireland. Health Protection Surveillance Centre.  
489 Published 22nd March 2020. Available at: [https://www.hpsc.ie/a-](https://www.hpsc.ie/a-z/respiratory/coronavirus/novelcoronavirus/casesinireland/epidemiologyofcovid-19inireland/march2020/COVID-19%20Epidemiology%20report%20for%20NPHE%2022.03.2020_v1%20web%20version.pdf)  
490 [z/respiratory/coronavirus/novelcoronavirus/casesinireland/epidemiologyofcovid-](https://www.hpsc.ie/a-z/respiratory/coronavirus/novelcoronavirus/casesinireland/epidemiologyofcovid-19inireland/march2020/COVID-19%20Epidemiology%20report%20for%20NPHE%2022.03.2020_v1%20web%20version.pdf)  
491 [19inireland/march2020/COVID-](https://www.hpsc.ie/a-z/respiratory/coronavirus/novelcoronavirus/casesinireland/epidemiologyofcovid-19inireland/march2020/COVID-19%20Epidemiology%20report%20for%20NPHE%2022.03.2020_v1%20web%20version.pdf)  
492 [19%20Epidemiology%20report%20for%20NPHE%2022.03.2020\\_v1%20web%20version.pdf](https://www.hpsc.ie/a-z/respiratory/coronavirus/novelcoronavirus/casesinireland/epidemiologyofcovid-19inireland/march2020/COVID-19%20Epidemiology%20report%20for%20NPHE%2022.03.2020_v1%20web%20version.pdf)  
493 [Accessed 3<sup>rd</sup> March 2021]
- 494 7. Kennelly B, O'Callaghan M, Coughlan D, Cullinan J, Doherty E, Glynn L, Moloney E, Queally M.  
495 The COVID-19 pandemic in Ireland: An overview of the health service and economic policy  
496 response. *Health Policy Technol.* 2020 Dec;9(4):419-429.
- 497 8. Salje, H. et al. Estimating the burden of SARS-CoV-2 in France. *Science* **369**, 208–211 (2020)
- 498 9. Kong TK. (2020). Longer incubation period of coronavirus disease 2019 (COVID-19) in older  
499 adults. *Aging Medicine*, 3(2), 102-109.
- 500 10. Mueller JT, McConnell K., Berne Burow P., Pofahl K., Merdjanoff AA., Farrell J. (2021).  
501 Impacts of the COVID-19 pandemic on rural America Proceedings of the National Academy  
502 of Sciences. Jan 2021, 118 (1)
- 503 11. Clark, A., Jit, M., Warren-Gash, C., Guthrie, B., Wang, H. H., Mercer, S. W., ... & Jarvis, C. I.  
504 (2020). Global, regional, and national estimates of the population at increased risk of severe  
505 COVID-19 due to underlying health conditions in 2020: a modelling study. *The Lancet Global*  
506 *Health*, 8(8), e1003-e1017.
- 507 12. Domegan, L., Garvey, P., McKeown, P., Johnson, H., Hynds, P., O'Dwyer, J., & ÓhAiseadha, C.  
508 (2021). Geocoding cryptosporidiosis cases in Ireland (2008–2017)—development of a  
509 reliable, reproducible, multiphase geocoding methodology. *Irish Journal of Medical Science*  
510 (1971-), 1-11.
- 511 13. HPSC (2021). Covid-19 Case Definitions. Available at: [https://www.hpsc.ie/a-](https://www.hpsc.ie/a-z/respiratory/coronavirus/novelcoronavirus/casedefinitions/)  
512 [z/respiratory/coronavirus/novelcoronavirus/casedefinitions/](https://www.hpsc.ie/a-z/respiratory/coronavirus/novelcoronavirus/casedefinitions/) [Accessed 3<sup>rd</sup> March 2021]
- 513 14. Haase T., Pratchhke J. (2012). The 2011 Pobal HP Deprivation Index for small areas (SA):  
514 Introduction and reference tables. Poabl. Dublin
- 515 15. Kuhn, M., Wing, J., Weston, S., Williams, A., Keefer, C., Engelhardt, A., ... & Benesty, M.  
516 (2020). Package 'caret'. *The R Journal*, 223.

- 517 16. Parcha, V., Patel, N., Kalra, R., Suri, S. S., Arora, G., & Arora, P. (2020, December). Mortality  
518 due to mitral regurgitation among adults in the United States: 1999-2018. In *Mayo Clinic*  
519 *Proceedings* (Vol. 95, No. 12, pp. 2633-2643). Elsevier.
- 520 17. Kim, H. J., Yu, B., & Feuer, E. J. (2008). Inference in segmented line regression: a simulation  
521 study. *Journal of Statistical Computation and Simulation*, 78(11), 1087-1103.
- 522 18. Wagner, A. K., Soumerai, S. B., Zhang, F., & Ross-Degnan, D. (2002). Segmented  
523 regression analysis of interrupted time series studies in medication use research. *Journal of*  
524 *clinical pharmacy and therapeutics*, 27(4), 299-309.
- 525 19. Muggeo, V. M. (2008). Segmented: an R package to fit regression models with broken-line  
526 relationships. *R news*, 8(1), 20-25.
- 527 20. Maloney W., Taskin T. (2020). *Determinants of social distancing and economic*  
528 *activity during COVID-19: A global view*. The World Bank.
- 529 21. Audi, A., Allbrahim, M., Kaddoura, M., Hijazi, G., Yassine, H. M., & Zaraket, H. (2020).  
530 Seasonality of Respiratory Viral Infections: Will COVID-19 Follow Suit? *Frontiers in Public*  
531 *Health*, 8, 576.
- 532 22. Merow, C., & Urban, M. C. (2020). Seasonality and uncertainty in global COVID-19 growth  
533 rates. *Proceedings of the National Academy of Sciences*, 117(44), 27456-27464.
- 534 23. Heavey, L., Casey, G., Kelly, C., Kelly, D., & McDarby, G. (2020). No evidence of secondary  
535 transmission of COVID-19 from children attending school in Ireland, 2020. *Eurosurveillance*,  
536 25(21), 2000903.
- 537 24. Santamaría, L., & Hortal, J. (2021). COVID-19 effective reproduction number dropped during  
538 Spain's nationwide dropdown, then spiked at lower-incidence regions. *Science of the Total*  
539 *Environment*, 751, 142257.
- 540 25. Ibarra-Vega, D. (2020). Lockdown, one, two, none, or smart. Modeling containing covid-19  
541 infection. A conceptual model. *Science of the Total Environment*, 730, 138917.
- 542 26. Ambikapathy, B., & Krishnamurthy, K. (2020). Mathematical modelling to assess the impact  
543 of lockdown on COVID-19 transmission in India: Model development and validation. *JMIR*  
544 *public health and surveillance*, 6(2), e19368.
- 545 27. Kucharski, A. J., Russell, T. W., Diamond, C., Liu, Y., Edmunds, J., Funk, S., ... & Flasche, S.  
546 (2020). Early dynamics of transmission and control of COVID-19: a mathematical modelling  
547 study. *The lancet infectious diseases*, 20(5), 553-558.
- 548 28. Savaris, R. F., Pumi, G., Dalzochio, J., & Kunst, R. (2021). Stay-at-home policy is a case of  
549 exception fallacy: an internet-based ecological study. *Scientific reports*, 11(1), 1-13.
- 550 29. Wieland, T. (2020). A phenomenological approach to assessing the effectiveness of COVID-  
551 19 related nonpharmaceutical interventions in Germany. *Safety Science*, 131, 104924.
- 552 30. Post, R. A., Regis, M., Zhan, Z., & van den Heuvel, E. R. (2021). How did governmental  
553 interventions affect the spread of COVID-19 in European countries? *BMC public*  
554 *health*, 21(1), 1-11.

- 555 31. González-Sanguino, C., Ausín, B., Castellanos, M. Á., Saiz, J., López-Gómez, A., Ugidos, C., &  
556 Muñoz, M. (2020). Mental health consequences during the initial stage of the 2020  
557 Coronavirus pandemic (COVID-19) in Spain. *Brain, behavior, and immunity*, *87*, 172-176.
- 558 32. Rajkumar, R. P. (2020). COVID-19 and mental health: A review of the existing  
559 literature. *Asian journal of psychiatry*, *52*, 102066.
- 560 33. Liu, Y., Yan, L. M., Wan, L., Xiang, T. X., Le, A., Liu, J. M., ... & Zhang, W. (2020). Viral dynamics  
561 in mild and severe cases of COVID-19. *The Lancet Infectious Diseases*, *20*(6), 656-657.
- 562 34. Huang, Q., Jackson, S., Derakhshan, S., Lee, L., Pham, E., Jackson, A., & Cutter, S. L. (2021).  
563 Urban-rural differences in COVID-19 exposures and outcomes in the South: A preliminary  
564 analysis of South Carolina. *PLoS one*, *16*(2), e0246548.
- 565 35. Henning-Smith, C. (2020). The unique impact of COVID-19 on older adults in rural  
566 areas. *Journal of aging & social policy*, *32*(4-5), 396-402.
- 567 36. Central Statistics Office (2019). Urban and Rural life in Ireland. Available at:  
568 [https://www.cso.ie/en/releasesandpublications/ep/p-  
569 urli/urbanandrurallifeinireland2019/introduction/](https://www.cso.ie/en/releasesandpublications/ep/p-urli/urbanandrurallifeinireland2019/introduction/) [Assessed on March 23<sup>rd</sup> 2021]
- 570 37. van Gerwen, M., Alsen, M., Little, C., Barlow, J., Genden, E., Naymagon, L., & Tremblay, D.  
571 (2021). Risk factors and outcomes of COVID-19 in New York City; a retrospective cohort  
572 study. *Journal of medical virology*, *93*(2), 907-915.
- 573  
574
